# Supplementary material for: Phytoplankton growth responses to Asian dust additions in the Northwest Pacific Ocean versus the Yellow Sea
Source: Copernicus journal article supplement (doi:10.5194/bg-2017-176), 2017-06-30
Supplement: Supplementary file 1 [file bg-2017-176-supplement.pdf]

# Supplementary information

## Text S1

### Simulation of Asian dust

When dust travels over the Asian continent through the atmosphere, it can experience mixing and  
5 deposition, as well as undergo chemical reactions (Formenti et al., 2011). The Asian continent suffers  
from air pollution to varying extents, with dynamically changing emissions of anthropogenic pollutants  
such as NO<sub>x</sub>, SO<sub>2</sub>, and NH<sub>3</sub> (Kim et al., 2014). The aging processes, i.e., the reactions of dust aerosols  
with anthropogenic pollutants, result in the Asian dust carrying a large amount of nutrients and  
bioavailable trace metals, prior to its deposition in the oceans. In this study, we followed the method of  
10 Guieu (2010) to mix the dust and cloud water (100 g L<sup>-1</sup>) to simulate the aging process. The chemical  
compositions of the reference eastern Asian rains and cloud water used in this study are summarized in  
Table S1. As the uptake of organic acidic gases during transport is complicated for Asian dust, we did  
not add oxalic acid, which was used for simulating the Saharan dust by Guieu et al. (2010), to simplify  
the reaction of dust surface and emphasize the importance of inorganic acids (H<sub>2</sub>SO<sub>4</sub> and HNO<sub>3</sub>) (Fan et  
15 al., 2006; Formenti et al., 2011; Shi et al., 2012).

### References

- Fan, S. M., Moxim, W. J., and Levy, H.: Aeolian input of bioavailable iron to the ocean. *Geophysical  
research letters*, 33, 359-377, doi: 10.1029/2005GL024852, 2006.
- Formenti, P., Schütz, L., Balkanski, Y., Desboeufs, K., Ebert, M., Kandler, A. Petzold, D. Scheuven,  
20 S. Weinbruch, and Zhang, D.: Recent progress in understanding physical and chemical properties of  
African and Asian mineral dust. *Atmospheric Chemistry and Physics*, 11, 8231-8256, doi: 10.5194/acp-  
11-8231-2011, 2011.
- Kim, I.-N., Lee, K., Gruber, N., Karl, D. M., Bullister, J. L., Yang, S., and Kim, T.-W.: Increasing  
anthropogenic nitrogen in the North Pacific Ocean, *Science*, 346, 1102-1106, doi:  
25 10.1126/science.1258396, 2014.
- Meskhidze, N., Chameides, W. L., Nenes, A., and Chen, G.: Iron mobilization in mineral dust: Can  
anthropogenic SO<sub>2</sub> emissions affect ocean productivity?. *Geophysical Research Letters*, 30, 267-283,  
doi: 10.1029/2003GL018035, 2003.
- Sakihama, H., Ishiki, M., and Tokuyama, A.: Chemical characteristics of precipitation in Okinawa Island,

- 30 Japan. *Atmospheric Environment*, 42, 2320-2335, doi: 10.1016/j.atmosenv.2007.12.026, 2008.
- Sasakawa, M., and Uematsu, M.: Chemical composition of aerosol, sea fog, and rainwater in the marine boundary layer of the northwestern North Pacific and its marginal seas. *Journal of Geophysical Research: Atmospheres*, 107(24): ACH 17-1–ACH 17-9, doi: 10.1029/2001JD001004, 2002.
- Shi, J., Gao, H., Zhang, J., Tan, S., Ren, J., Liu, C., Liu, Y., and Yao, X.: Examination of causative link  
35 between a spring bloom and dry/wet deposition of Asian dust in the Yellow Sea, China, *Journal of Geophysical Research: Atmospheres*, 117, D17304, doi:10.1029/2012JD017983, 2012.
- Wang, Z., Akimoto, H., and Uno, I.: Neutralization of soil aerosol and its impact on the distribution of acid rain over east Asia: Observations and model results. *Journal of Geophysical Research: Atmospheres*, 107(D19): ACH 6-1–ACH 6-12, doi: 10.1029/2001JD001040, 2002.
- 40 Watanabe, K., Ishizaka, Y., and Takenaka, C.: Chemical characteristics of cloud water over the Japan Sea and the Northwestern Pacific Ocean near the central part of Japan: airborne measurements. *Atmospheric Environment*, 35, 645-655, doi: 10.1016/S1352-2310(00)00358-7, 2001.
- Zhang, J., Zhang, G. S., Bi, Y. F., and Liu, S. M.: Nitrogen species in rainwater and aerosols of the Yellow and East China seas: Effects of the East Asian monsoon and anthropogenic emissions and relevance for  
45 the NW Pacific Ocean. *Global Biogeochemical Cycles*, 25, 113-120, doi: 10.1029/2010GB003896, 2011.

**Table S1.** Primary chemical composition of the rains in the eastern Asian region and the simulated eastern Asian cloud water.

|                                | pH        | NO <sub>3</sub> <sup>-</sup><br>(M) | SO <sub>4</sub> <sup>2-</sup><br>(M) |
|--------------------------------|-----------|-------------------------------------|--------------------------------------|
| Reference eastern Asian rains* | 3.89–7.61 | 10 <sup>-5</sup>                    | 10 <sup>-5</sup>                     |
| Simulated cloud water          | 1**       | 10 <sup>-1</sup>                    | 10 <sup>-1</sup>                     |

\*Sasakawa and Uematsu, 2002; Watanabe et al. 2001; Zhang et al. 2011; Sakihama et al. 2008; Wang et al. 2002.

\*\* Meskhidze et al., 2003.

50

**Table S2.** Recovery yield, accuracy, and detection limit for trace metal analysis

| Metal | Detection limit ( $\mu\text{g L}^{-1}$ )* | Recovery (%) | RSD (%)** |
|-------|-------------------------------------------|--------------|-----------|
| Zn    | 0.012                                     | 90.6         | 3.17      |
| Cu    | 0.226                                     | 95.2         | 2.09      |
| Cd    | 0.016                                     | 88.5         | 0.87      |
| Pb    | 0.019                                     | 93.2         | 2.93      |
| Co    | 0.017                                     | 97.9         | 0.24      |
| Fe    | 3.738                                     | 95.4         | 3.88      |
| Mn    | 0.056                                     | 90.9         | 4.48      |

\* Detection limit was calculated as three times the standard deviation of the blank.

\*\* RSD means 'Relative Standard Deviation'.

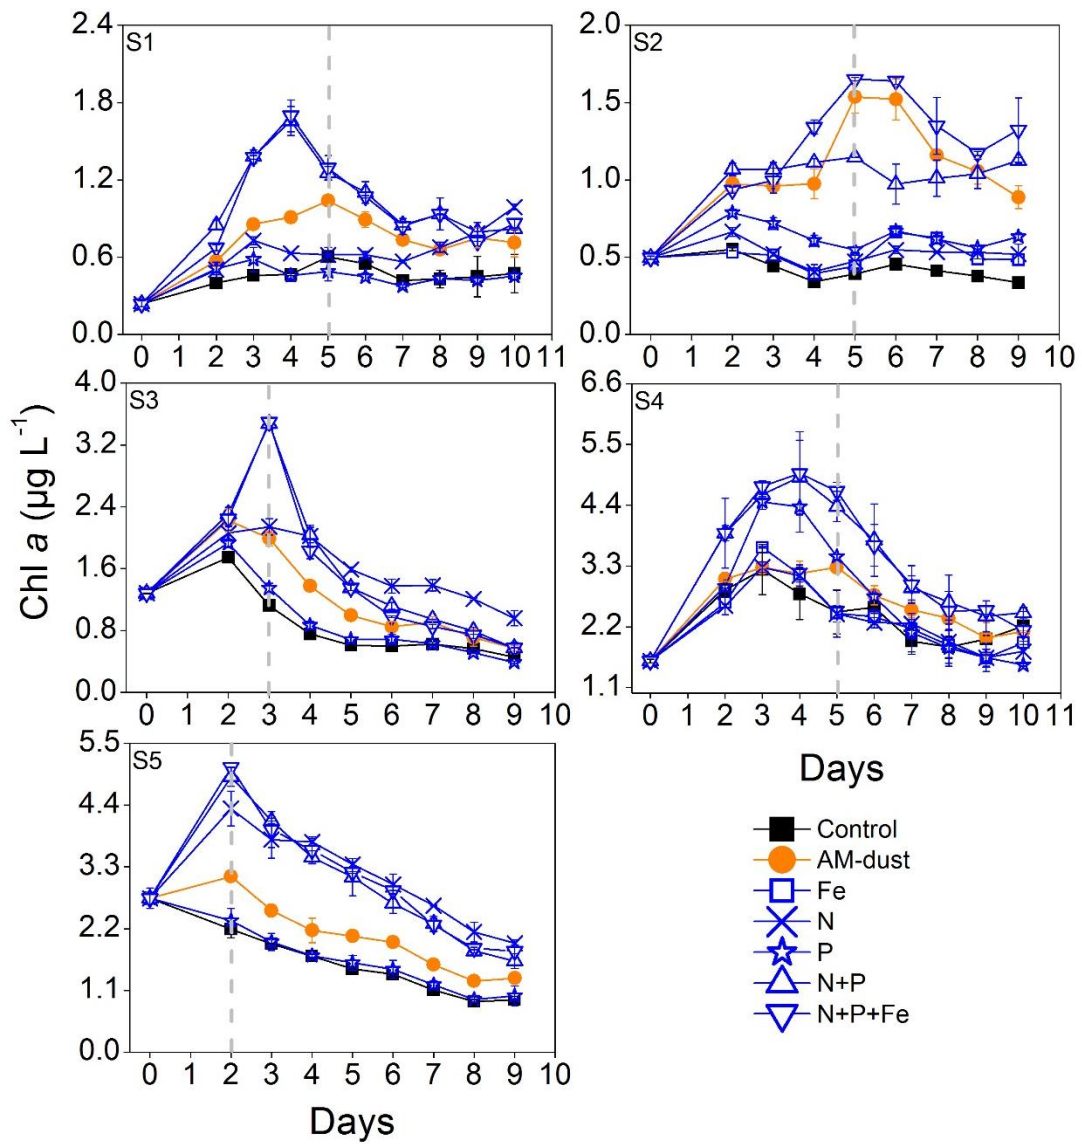

**Figure S1.** Changes in Chl *a* during the incubation experiments at each station. The successive increase during the incubation period in this study is identified by the dotted line.

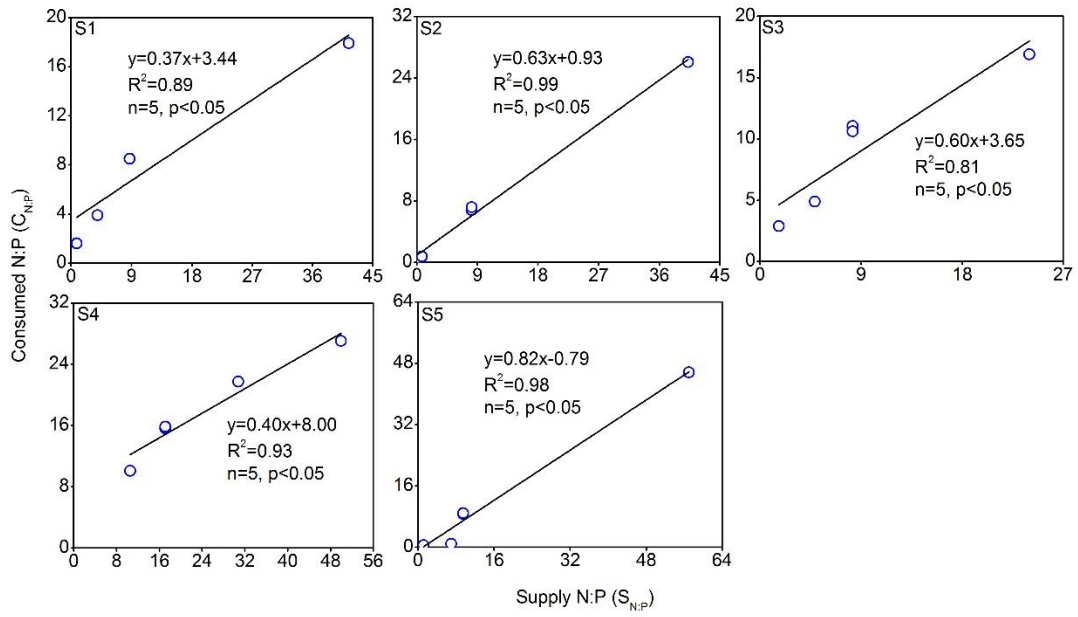

60

**Figure S2.** The relationship between the consumed N:P ratio ( $C_{N:P}$ ) and supply N:P ratio ( $S_{N:P}$ ) in the control and the various nutrient treatments during the successive increase in the incubation period at each station
